# Supplementary material for: Broadband and weak-dispersion nonlinear response enhancement in the epsilon-near-zero region of a nano-stepped metasurface
Source: Royal Society of Chemistry journal article supplement (doi:10.1039/d4cp02439g), 2024-01-01
Supplement: d4cp02439g1.pdf [file d4cp02439g1.pdf]

## Supplementary Information

### Broadband and weak-dispersion nonlinear response enhancement in the epsilon-near-zero region of a nano-stepped metasurface

Yanxin Lu,<sup>a,b</sup> Jiahui Zheng,<sup>a,b</sup> Feilian Zhang,<sup>a,b</sup> Qiqi Guo,<sup>a,b</sup> Yunfei Song,<sup>a,b</sup> Jiannan Dong,<sup>a,b</sup> and Yihang Chen<sup>a,b,\*</sup>

<sup>a</sup>Key Laboratory of Atomic and Subatomic Structure and Quantum Control (Ministry of Education), Guangdong Basic Research Center of Excellence for Structure and Fundamental Interactions of Matter, School of Physics, South China Normal University, Guangzhou 510006, China.

<sup>b</sup>Guangdong Provincial Key Laboratory of Quantum Engineering and Quantum Materials, Guangdong-Hong Kong Joint Laboratory of Quantum Matter, South China Normal University, Guangzhou 510006, China.

\*Corresponding author: yhchen@scnu.edu.cn

#### 1. The effective permittivity and electric field distribution of the metasurface deviated from the optimum structural parameters

We set  $h_2=140\text{nm}$  (112nm in the main text) and  $h_3=80\text{nm}$  (82nm in the main text). The effective permittivity of the metasurface with the unoptimized parameters is shown in Fig. S1(a). The narrowing of the ENZ waveband is accompanied by a deviation of the metasurface's effective permittivity further from zero. Figure S1(b) and (c) illustrate the electric field distribution of the metasurface at the wavelength of 1400 nm, corresponding to the ENZ point, and the wavelength-dependent variation of the electric field distribution at  $x=-100\text{ nm}$ . It is evident that a slight shift in parameters brings a slight reduction in field enhancements and nonlinear optical properties. Overall, deviations of structural parameters from the optimum values may result in a narrower ENZ band (and even absent), yet the field enhancements and nonlinear optical properties are retained within the possible ENZ band.

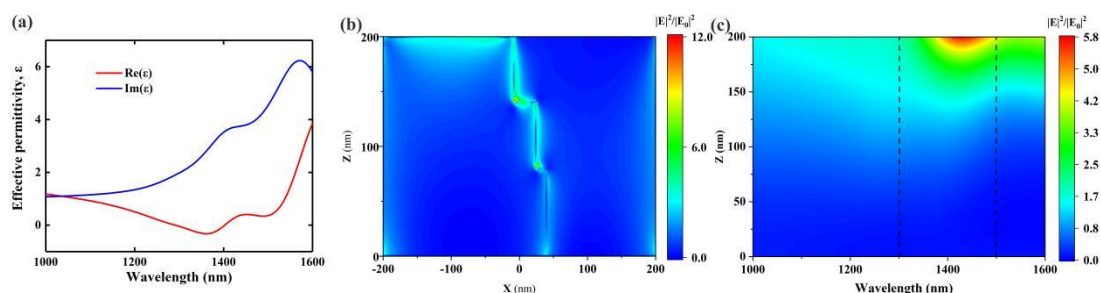

**Fig.S1(a)** Real (red line) and imaginary (blue line) parts of the effective permittivity of the considered metasurface with the sub-optimum parameters  $P = 400\text{ nm}$ ,  $h_1 = 200\text{ nm}$ ,  $w_1 = 192\text{ nm}$ ,  $h_2 = 140\text{ nm}$ ,  $w_2 = 32\text{ nm}$ ,  $h_3 = 80\text{ nm}$ ,  $w_3 = 16\text{ nm}$ ,  $w_4 = 160\text{ nm}$ . (b) Electric field distribution of the metasurface at the wavelength of 1400 nm; (c) Wavelength dependence of the electric field distribution at the  $x=-100\text{ nm}$ .
